# Supplementary material
Source: PubMed Central journal article supplement (PMC4698332)
Supplement: NIHMS176612-supplement-05.pdf [file NIHMS176612-supplement-05.pdf]

**Supplemental Table 1. The details of gene expression profiles of 30 compounds in NB cells**

| <b>Drugs</b>                   | <b>Dose 1</b> | <b>Dose 2</b> | <b>Mechanism of action</b>                                                          |
|--------------------------------|---------------|---------------|-------------------------------------------------------------------------------------|
| 17AAG                          | 10 $\mu$ M    | 1 $\mu$ M     | Inhibits Hsp90                                                                      |
| 5-azacytidine                  | 10 $\mu$ M    | 1 $\mu$ M     | Incorporate into DNA and RNA to inhibit transcription and translation               |
| Actinomycin D                  | 5 nM          | 0.5 nM        | Intercalate with DNA                                                                |
| Alsterpaullone                 | 5 $\mu$ M     | 0.5 $\mu$ M   | Inhibit CDK1/Cyclin B                                                               |
| Amonafide                      | 10 $\mu$ M    | 1 $\mu$ M     | Inhibit Top2                                                                        |
| Arsenic trioxide               | 1 $\mu$ M     | 0.1 $\mu$ M   | PML/RAR alpha degradation; creation of reactive oxygen species, microtubule binding |
| Bortezomib analog              | 0.5 $\mu$ M   | 0.05 $\mu$ M  | Inhibit proteasome                                                                  |
| Bortezomib                     | 10 $\mu$ M    | 1 $\mu$ M     | Inhibit proteasome                                                                  |
| Camptothecin                   | 10 $\mu$ M    | 1 $\mu$ M     | Inhibit Top1                                                                        |
| CDDO-ME                        | 10 $\mu$ M    | 1 $\mu$ M     | Inhibit AKT, NFkB, Notch1, mTOR, STAT3, and JNK                                     |
| Colchicine                     | 50 nM         | 5 nM          | Inhibit microtubule polymerization                                                  |
| Cucurbitacin I                 | 0.5 $\mu$ M   | 0.05 $\mu$ M  | Inhibit STAT3 activation                                                            |
| Daunorubicin                   | 50 nM         | 5 nM          | Inhibit Top2                                                                        |
| Didemnin B                     | 5 nM          | 0.5 nM        | Inhibit protein synthesis by binding to human elongation factor 1A                  |
| Doxorubicin                    | 0.5 $\mu$ M   | 0.05 $\mu$ M  | Inhibit Top2                                                                        |
| Echinomycin                    | 5 nM          | 0.5 nM        | Inhibit Top2                                                                        |
| Epoxy anthraquinone derivative | 5 $\mu$ M     | 0.5 $\mu$ M   | Unkonwn                                                                             |
| Etoposide                      | 5 $\mu$ M     | 0.5 $\mu$ M   | Inhibit Top2                                                                        |
| Helenalin                      | 10 $\mu$ M    | 1 $\mu$ M     | Unknown                                                                             |
| Maytansine                     | 5 nM          | 0.5 nM        | Inhibit microtubule polymerization                                                  |
| Mitoxantrone                   | 0.5 $\mu$ M   | 0.05 $\mu$ M  | Inhibit Top2                                                                        |
| Paclitaxel                     | 50 nM         | 5 nM          | Inhibit microtubule depolymerization                                                |
| PD 0332991 (Pfizer Inc)        | 10 $\mu$ M    | 1 $\mu$ M     | Inhibit CDK4/6                                                                      |
| Perezone                       | 10 $\mu$ M    | 1 $\mu$ M     | Unkonwn                                                                             |
| Teniposide                     | 2.5 $\mu$ M   | 0.25 $\mu$ M  | Inhibit Top2                                                                        |
| Tetrandrine                    | 10 $\mu$ M    | 1 $\mu$ M     | Induce CDK inhibitor p21; induction of cyclin D1; and G1 to S arrest                |
| Thioguanine                    | 2.5 $\mu$ M   | 0.25 $\mu$ M  | Incorporated into DNA and RNA to inhibit transcription and translation              |
| Topotecan                      | 10 $\mu$ M    | 1 $\mu$ M     | Inhibit Top1                                                                        |
| Valrubicin                     | 5 $\mu$ M     | 0.5 $\mu$ M   | Inhibit Top2                                                                        |
| Vincristine                    | 50 nM         | 5 nM          | Inhibit microtubule polymerization                                                  |
